# Supplementary material for: Discerning molecular-level CO2 adsorption behavior in amine-modified sorbents within a controlled CO2/H2O environment towards direct air capture
Source: Royal Society of Chemistry journal article supplement (doi:10.1039/d4ta05578k), 2024-01-01
Supplement: d4ta05578k1.pdf [file d4ta05578k1.pdf]

## Supporting Information

### **Discerning Molecular-Level CO<sub>2</sub> Adsorption Behavior in Amine-Modified Sorbents within a Controlled CO<sub>2</sub>/H<sub>2</sub>O Environment towards Direct Air Capture**

Ah-Young Song<sup>a,b</sup>, John Young<sup>c</sup>, Jieyu Wang<sup>a</sup>, Sophia N. Fricke<sup>a</sup>, Katia Piscina<sup>c</sup>, Raynald Giovine<sup>d</sup>, Susana Garcia<sup>c</sup>, Mijndert van der Spek<sup>c</sup>, Jeffrey A. Reimer<sup>a,b\*</sup>

\*reimer@berkeley.edu

<sup>a</sup> Department of Chemical and Biomolecular Engineering, University of California, Berkeley, Berkeley, CA 94720, USA

<sup>b</sup> Materials Sciences Division, Lawrence Berkeley National Laboratory, Berkeley, CA 94720, USA

<sup>c</sup> Research Centre for Carbon Solutions, Heriot-Watt University, Edinburgh, EH14 4AS, United Kingdom

<sup>d</sup> Pines Magnetic Resonance Center - Core Facility, University of California, Berkeley, CA 94720, USA

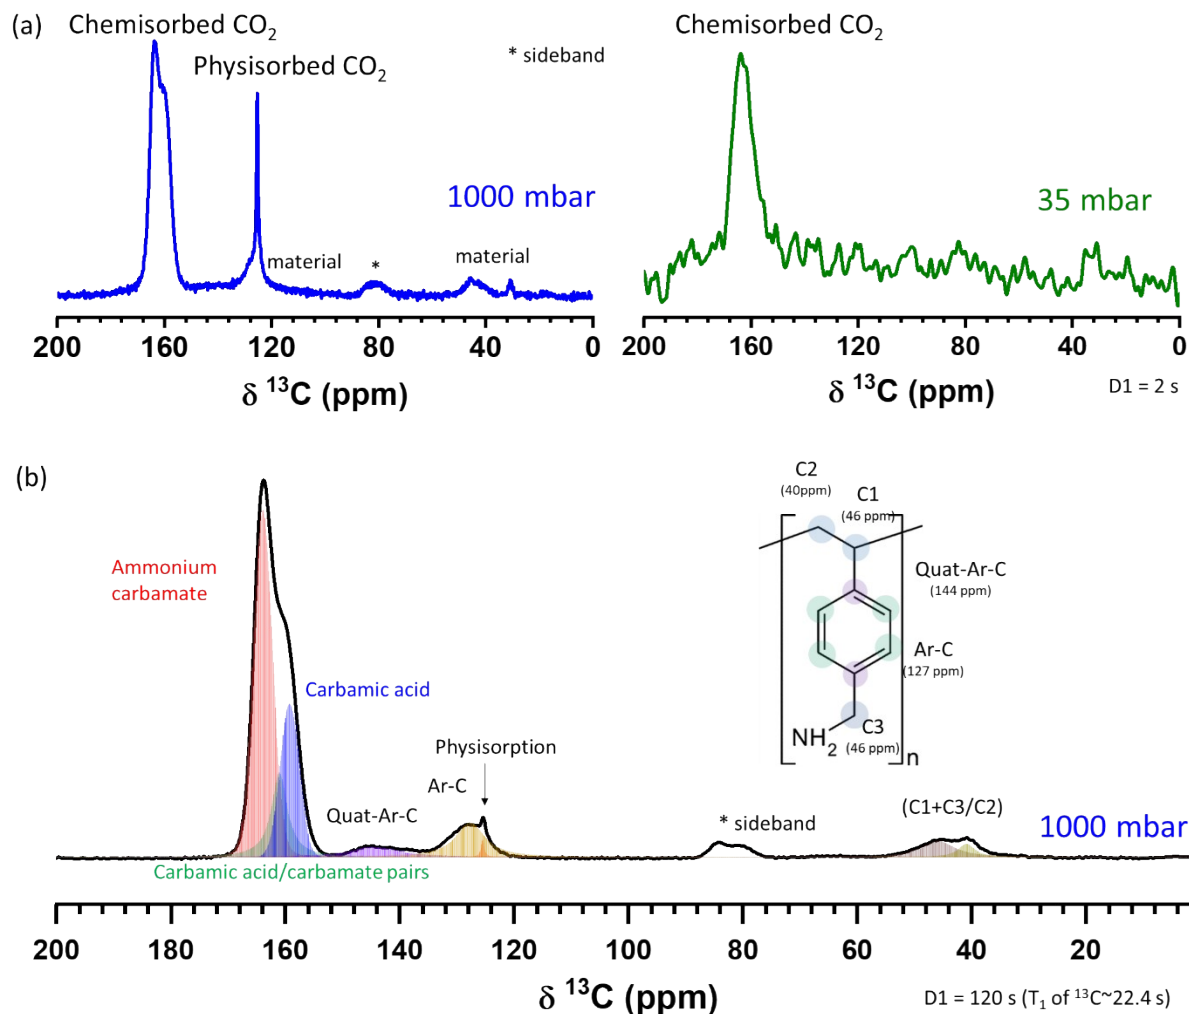

Fig. S1 <sup>13</sup>C direct polarization with (a) 2 s and (b) 120 s of recycle delay. (a) shows physisorbed CO<sub>2</sub> is only formed at pCO<sub>2</sub>= 1000 mbar; (b) analyzes the quantitative carbon of materials and chemisorption at ~ 1 bar, 25 °C within Lewatit® VP OC 1065. The peak at 31 ppm, associated with end group of the material, is clearly observed in (a) while it becomes very weak and does not yield accurate quantitative results due to its relatively low concentration.

Table. S1 Quantified carbon of the <sup>13</sup>C DPMAS shown in Fig. S1.

| Components                         | Integral (%)  | Relative ratio between chemisorption |
|------------------------------------|---------------|--------------------------------------|
| Ammonium carbamate (I)             | 43.0          | 56.5                                 |
| Carbamate/carbamic acid (II)       | 12.0          | 16                                   |
| Carbamic acid (III)                | 20.6          | 27.5                                 |
| Quaternary carbon in aromatic ring | 5.2           | -                                    |
| Aromatic carbon                    | 10.6          | -                                    |
| Aliphatic carbon (C1+C3/C2)        | 7.8 (5.1/2.7) | -                                    |

## Calculation of parameter (A) to determine ionic molecular character

Isotropic chemical shift ( $\delta_{iso}$ ), defined as the average of three principal components ( $\delta_{iso} = \delta_{11} + \delta_{22} + \delta_{33}/3$ ), identifies a functional group such as carboxylic carbon atoms. While protonation state has no effect on isotropic chemical shift ( $\delta_{iso}$ ), it significantly impacts a parameter (A), derived from  $\delta_{11} + \delta_{33} - \delta_{22}$  in a previous study.<sup>1</sup> It is attributed to the tensor elements  $\delta_{11}$  and  $\delta_{22}$ . These elements present opposite signs upon protonation, which results in cancellation in isotropic chemical shift ( $\delta_{iso}$ ), whereas it leads to a higher number in the defined parameter (A). Thus, the parameter (A) is utilized to determine the ionic molecular characters, e.g.  $A > 190$  ppm indicating protonated/neutral status as suggested by empirical data,<sup>1</sup> as illustrated in Fig. S2.

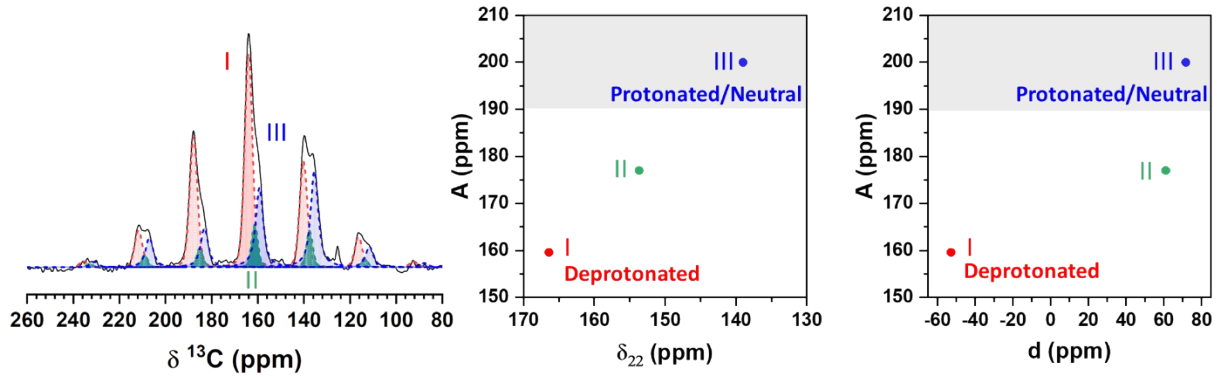

Fig. S2 Low-speed MAS  $^{13}\text{C}$  spectra of  $\text{CO}_2$  adsorbed Lewatit<sup>®</sup> VP OC 1065 at approximately 1 bar (11.7 T) and the estimated CSA (chemical shift anisotropy) tensor. Asymmetry parameter is  $A = \delta_{11} + \delta_{33} - \delta_{22}$ , and reduced anisotropy  $d = \delta_{33} - \delta_{iso}$ .

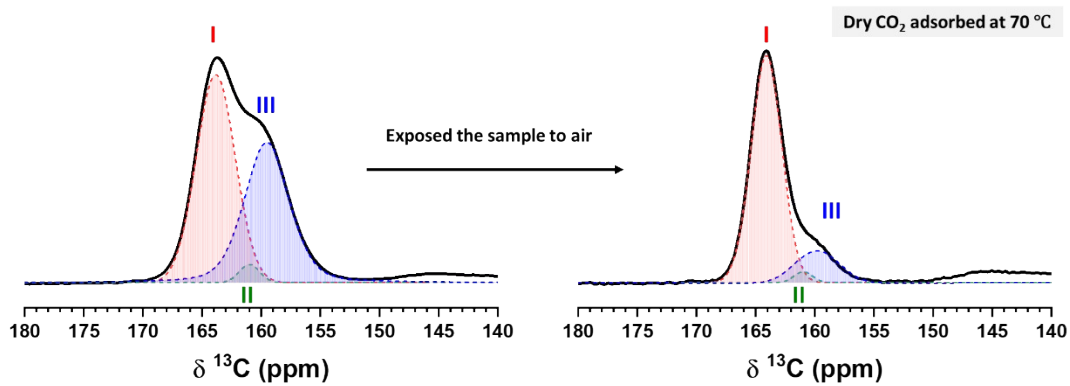

Fig. S3 Stability of the chemisorbed species by exposing the sample to the air. Solid-state NMR of  $^{13}\text{CO}_2$  adsorption at  $\sim 1$  bar, 70 °C within Lewatit<sup>®</sup> VP OC 1065 collected at 11.75T (before exposing to the air) and 9.4 T (after exposing to the air).

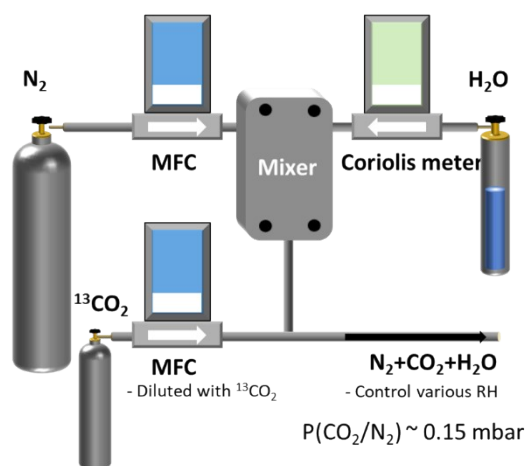

Fig. S4 Schematic of apparatus for preparing co-adsorption ( $CO_2$ ,  $N_2$ ,  $H_2O$ ) gas-dosed NMR samples.

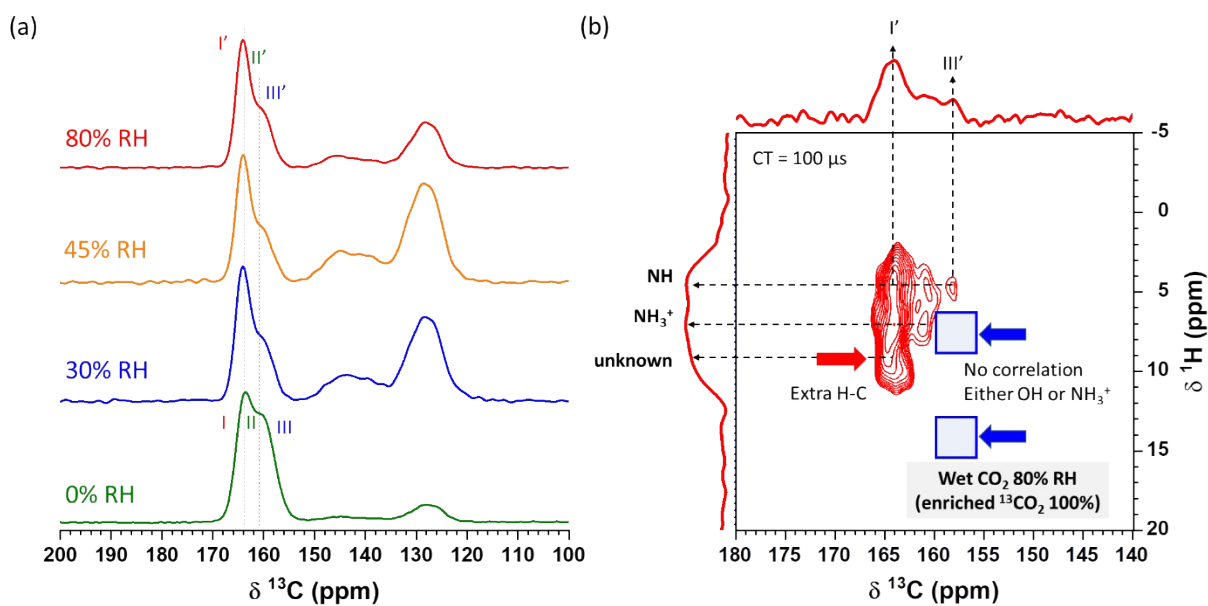

Fig. S5  $^{13}C$  MAS NMR (9.4 T) spectra dosed with co-adsorption ( $CO_2$  and  $H_2O$ ) at 1 bar of  $CO_2$  in the presence of water. (a)  $^{13}C$  CPMAS (CT = 2 ms) NMR spectra with variable relative humidity levels (RH0, RH30, RH45, and RH80); (b)  $^{13}C$ - $^1H$  FSLG-HETCOR spectra of co-adsorbed sorbent with RH80 (100  $\mu s$  of contact time)

## Estimation of $R_2$ to evaluate the pore expansion

The changes in transverse relaxation rate over time indicate a surface-to-volumetric expansion of the pores over time, as illustrated in Fig. 6 and Fig. S6. Carr-Purcell-Meiboom-Gill (CPMG)<sup>2,3</sup> echo trains yielded these rates and were acquired at intervals of approximately 5 minutes for 3 hours following the introduction of water to the activated sorbents. Inverse Laplace transform (ILT) analysis of the exponential decays of the echo envelopes reveals distinct aqueous domains within the sample: water confined in the pore displays a faster relaxation rate  $R_2$  (shorter  $T_2$ ) and free water outside the pore manifests a slower  $R_2$  (longer  $T_2$ ). This assessment is empirically described with in Equation S1

$$R_2 = R_{2b} + \rho \frac{S}{V} + \frac{D(\gamma GT_E)^2}{12} \quad (S\ 1)$$

Here,  $R_2$  is the (measured) pore-confined transverse relaxation rate,  $R_{2b}$  is the transverse relaxation rate in the absence of pore confinement,  $\rho$  is the surface relaxivity (given by the composition of the walls),  $S/V$  is the surface to volume ratio of the pore,  $D$  is diffusion coefficient of the fluid,  $\gamma$  is the gyromagnetic ratio of the nucleus,  $G$  is external magnetic field gradient, and  $T_E$  is experimental echo time.

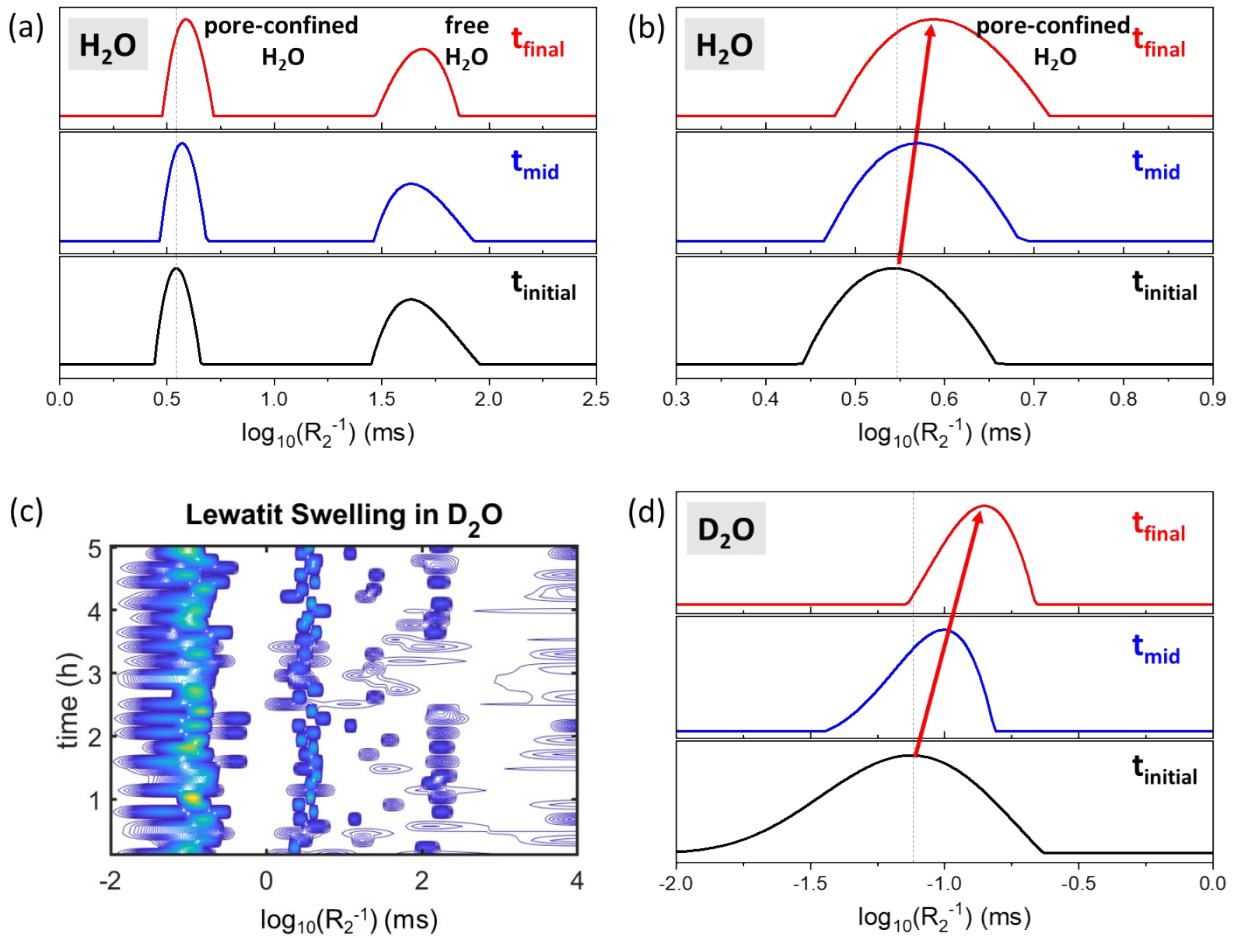

Fig. S6 Changes in transverse relaxation rates ( $R_2^{-1} = T_2$ ) of both H<sub>2</sub>O (a, b) and D<sub>2</sub>O (c, d) saturated within material, measured at a resonant <sup>1</sup>H frequency of 13.11 MHz over 24 hours. (a) The full range of the  $R_2$  distribution representing pore-confined H<sub>2</sub>O and free H<sub>2</sub>O; (b) a magnified view of (a), highlighting the  $R_2$  distribution of pore-confined H<sub>2</sub>O; (c) measuring  $R_2$  with D<sub>2</sub>O over time; (d) range of  $R_2$  showing expanded pore.

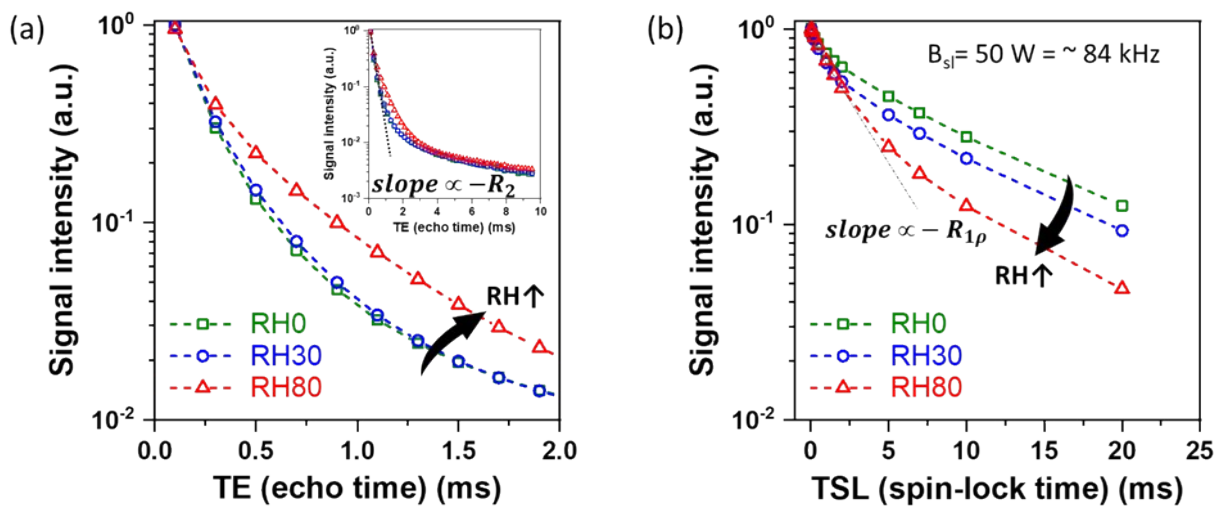

Fig. S7  $^1\text{H}$  NMR relaxation decay curves obtained at 9.4 T of co-adsorbed ( $\text{N}_2+\text{CO}_2+\text{H}_2\text{O}$ ) materials at 25  $^\circ\text{C}$  with RH0, RH30, and RH80 for (a)  $T_2 = (1/R_2)$  relaxations; and (b)  $T_{1\rho} = (1/R_{1\rho})$  relaxations. At the highest relative humidity, the rate of relaxation at kHz frequencies increases while relaxation rates at MHz frequencies decrease.

## References

1. Z. Gu and A. McDermott, *J. Am. Chem. Soc.*, 1993, **115**, 4282–4285.
2. H. Y. Carr and E. M. Purcell, *Phys. Rev.*, 1954, **94**, 630–638.
3. S. Meiboom and D. Gill, *Review of Scientific Instruments*, 1958, **29**, 688–691.
